# Supplementary material
Source: PubMed Central journal article supplement (PMC3461817)
Supplement: cbt-13-1112-s01.pdf [file cbt-13-1112-s01.pdf]

## **Supplemental Material to:**

**Zhanhai Shan, Guiyuan Li, Qimin Zhan and Dan Li**

**Gadd45a inhibits cell migration and invasion by altering  
the global RNA expression**

**Cancer Biology & Therapy 2012; 13(11)**

**<http://dx.doi.org/10.4161/cbt.21186>**

**<http://www.landesbioscience.com/journals/cbt/article/21186/>**

## Supplementary Table 1

### The aberrant genomic regions and its related genes in Gadd45 -/- cells.

| Genome Location          | Fold Change | Gene symbol | RefSeq.     |
|--------------------------|-------------|-------------|-------------|
| chrY:9448448-9450832     | 0.07        | Ssty1       | NM_009220   |
| chr12:76329361-76488943  | 0.27        | Smoc1       | NM_022316   |
| chrY:36855188-36881382   | 0.29        | Q810R0      | NM_201530   |
| chr11:87035475-87157487  | 0.48        | Tex14       | NM_031386.2 |
| chr4:117697888-117729401 | 0.49        | Q9D9N6      | AK006668    |
| chr4:115896237-116019924 | 2.22        | Prnpip1     | NM_080469   |
| chr6:3778060-3788083     | 2.48        | Bet1        | AK078796    |

Legends: Fold change epresented the fold change of aberration region in Gadd45a defective cells compared to wild type cells.

## Supplementary Table 2

### The aberrant methylation regions and its related genes in Gadd45 -/- cells.

| Genome Location         | Fold Change | Gene symbol   | RefSeq.      |
|-------------------------|-------------|---------------|--------------|
| chr1:49670437-49671004  | 0.47        | Tmeff2        | NM_019790    |
|                         |             | Scyl2         | NM_198021    |
| chr10:89115306-89116525 | 0.53        | Actr6         | NM_025914    |
|                         |             | Pftk1         | NM_011074    |
| chr5:5078426-5078954    | 0.70        | Fzd1          | NM_021457    |
|                         |             | Etv1          | AK032224     |
| chr12:40473520-40473860 | 0.63        | Arl4a         | NM_001039515 |
|                         |             | Clcn2         | NM_009900    |
| chr16:20629884-20630316 | 2.08        | Polr2h        | NM_145632    |
| chr9:3000029-3029848    | 1.35        | 4930433N12Rik | NM_053265    |
|                         |             | 4931408C20Rik | NM_001033764 |
| chr1:30104082-30104978  | 1.18        | AK087209      | AK087209     |

Legends: Fold change epresented the fold change of aberration region in Gadd45a defective cells compared to wild type cells.

### Supplementary Table 3

#### Primers for Real-time PCR validation.

| Gene symbol | Forward Primer              | Reverse Primer               |
|-------------|-----------------------------|------------------------------|
| Mmp3        | AGCAGGTTATCCTAAAAGCATT<br>C | TTTCTTCTCATCAAACCTCCAGTA     |
| Col3a1      | TGGGGTGGAGGGAGTTTACA        | CACTTGTGGCTTCTGACTATCTT<br>C |
| Col1a2      | TCATTGGGATGGTCTACTCA<br>C   | TCAGAACCAAATGGACTACGC        |
| Lama4       | TCACTATGACCTGTCCGTTTCTC     | TGCCGCCGATGACTTTAGA          |
| Vcam1       | GTGAAGGGATTAACGAGGCTGG      | GTGCAGGAGATAATGACGGTGTC      |
| Krt18       | TTGCTGAGGTCCTGAGATTTG       | ACCCTCCCGAGATTACAACC         |
| Krt19       | AAGGCGTGTCTGTCTCAAAC        | TTCCTGGTGCTCATCTTGTTAC       |
| Alcam       | CTCGTTGCTGGTGTCTCTA         | AATCCGCTCCTCTCTTAGGC         |
| Igsf4a      | CCCTTAGCACCCATCCTGA         | TGTCAACATTGTAAGCCATAAAG<br>T |
| Itgb1       | ACAGAGCCCCAAAACCTACCC       | GTTGTCTCCTGCGACTTCA          |
| GAPDH       | GTTGTCTCCTGCGACTTCA         | TGGTCCAGGGTTTCTTACTC         |
